# Supplementary material for: Proposing the prospects of Ti3CN transition metal carbides (MXenes) as anodes of Li-ion batteries: a DFT study
Source: Royal Society of Chemistry journal article supplement (doi:10.1039/c6cp06018h), 2016-01-01

**ELECTRONIC SUPPLEMENTARY INFORMATION**

**Proposing prospects of Ti<sub>3</sub>CN transition metal carbides (MXenes) as  
anode in Li-ion battery: a DFT study**

Xingzhu Chen,<sup>a</sup> Zhouzhou Kong,<sup>a</sup> Neng Li,<sup>\*,a</sup> Xiujian Zhao,<sup>\*,a</sup> and Chenghua Sun<sup>\*,b</sup>

<sup>a</sup>State Key Laboratory of Silicate Materials for Architectures, Wuhan University of Technology,  
Hubei, 430070, China

<sup>b</sup>ARC Centre of Excellence for Electromaterials Science (ACES), School of Chemistry, Faculty  
of Science, Monash University, Clayton, VIC 3800, Australia

\*Author to whom correspondence should be addressed:

NL & XZ: Tel: (+86) 27 87652553; Fax: (+86) 27 87883743; Email: [lineng@whut.edu.cn](mailto:lineng@whut.edu.cn),  
[opluse@whut.edu.cn](mailto:opluse@whut.edu.cn),

CS: Tel: (+61) 3 9902 9916; Fax: (+61) 3 9905 4597; E-mail: [Chenghua.Sun@monash.edu](mailto:Chenghua.Sun@monash.edu)

---

|                                           | Pages |
|-------------------------------------------|-------|
| <b>DFT-D2 METHOD DETAILS</b>              | S1    |
| <b>OPTIMIZED CARTESIAN COORDINATES</b>    | S2    |
| <b>TOTAL ENERGIES OF ADSORPTION SITES</b> | S3    |
| <b>BADER CHARGE POPULATION ANALYSIS</b>   | S4    |
| <b>COMPUTATION OF DIFFUSION BARRIERS</b>  | S5    |
| <b>DENSITY OF STATE PROFILE</b>           | S6    |

---

## 1. DFT-D2 METHOD DETAILS (The van der Waals (vdW) interactions correction)

The additional functional was introduced into standard DFT calculations, because DFT cannot deal with the van der Waals (vdW) interactions in weakly bonded systems such as atom adsorption on 2D MXene substrate considered in this work.

There are two types' methods for vdW correction in VASP: the vdW-DF and DFT-D approaches. The DFT-D method adds a semiempirical pairwise force field to conventional DFT calculations,<sup>1</sup> while the vdW-DF approach adds a nonlocal correlation functional that approximately account for dispersion interactions, which will complicate the calculation.<sup>2</sup>

On the one hand, as far as we know, there has no proof for which one between vdW-DF and DFT-D is more appropriate in the specific calculation. On the other hand, the DFT-D method (especially DFT-D2 and DFT-D3) is widely used in recent years. There are some latest literatures used DFT-D2 to describe the vdW force in MXene system, which is exactly the same with our case.<sup>3,4</sup> Thus, the DFT-D2 approach was used for our system in this work.

### REFERENCES

- 1 S. Grimme, *Journal of computational chemistry*, 2006, **27**, 1787-1799.
- 2 M. Dion, H. Rydberg, E. Schröder, D.C. Langreth, B.I. Lundqvist, *Physical review letters*, 2004, **92**, 246401.
- 3 Q. Tang, Z. Zhou and P. Shen, *Journal of the American Chemical Society*, 2012, **134**, 16909-16916.
- 4 X. Zhang, J. Lei, D. Wu, X. Zhao, Y. Jing and Z. Zhou, *Journal of Materials Chemistry A*, 2016, **4**, 4871-4876.

## 2. OPTIMIZED CARTESIAN COORDINATES

### The optimized atomic coordinates of Ti<sub>3</sub>CN (2×2×1 supercell)

1.0000000000

|               |              |               |
|---------------|--------------|---------------|
| 6.1308512688  | 0.0000000000 | 0.0000000000  |
| -3.0636133053 | 5.3026007279 | 0.0000000000  |
| 0.0121473158  | 0.0176100747 | 26.8308134621 |

4 4 12

Cartesian

|    |              |             |              |
|----|--------------|-------------|--------------|
| N  | 1.541329474  | 0.891884480 | 14.305761827 |
| N  | 4.605746884  | 0.892153272 | 14.305736239 |
| N  | 0.008700435  | 3.544468165 | 14.306423913 |
| N  | 3.074855029  | 3.544005636 | 14.306220809 |
| C  | 0.007256073  | 1.774827009 | 11.718509567 |
| C  | 3.073139231  | 1.773552506 | 11.718279276 |
| C  | -1.524074076 | 4.425590976 | 11.718683084 |
| C  | 1.540984318  | 4.425760952 | 11.718585531 |
| Ti | -3.056545857 | 5.309836943 | 13.008646153 |
| Ti | 0.009156831  | 1.776402817 | 15.311497371 |
| Ti | 1.538509956  | 0.890835812 | 10.678390339 |
| Ti | 0.008415803  | 5.310095576 | 13.009273855 |
| Ti | 3.074107839  | 1.775837108 | 15.307221001 |
| Ti | 4.604133685  | 0.890722306 | 10.678448711 |
| Ti | -1.525399202 | 2.659436183 | 13.008554196 |
| Ti | -1.522209992 | 4.428731492 | 15.308383649 |
| Ti | 0.006314345  | 3.541908927 | 10.678748569 |
| Ti | 1.540871011  | 2.659110131 | 13.008257537 |
| Ti | 1.542130984  | 4.428225364 | 15.308206133 |
| Ti | 3.072147344  | 3.542136252 | 10.678385541 |

### 3. The Total energy of T (T= F, O, OH) @ Ti<sub>3</sub>CN with different sites

| T group                 | C side (eV) |          |          | N side (eV) |          |          |
|-------------------------|-------------|----------|----------|-------------|----------|----------|
|                         | C-top       | FCC      | Ti-top   | N-top       | FCC      | Ti-top   |
| F @ Ti <sub>3</sub> CN  | -190.951    | -191.382 | -190.452 | -190.847    | -191.203 | -190.253 |
| O @ Ti <sub>3</sub> CN  | -193.976    | -194.548 | -192.384 | -193.878    | -194.358 | -192.381 |
| OH @ Ti <sub>3</sub> CN | -197.173    | -197.557 | -196.299 | -197.116    | -197.417 | -196.135 |

### 4. The Total energy of Li @ Ti<sub>3</sub>CNT<sub>2</sub> with different sites

|                                          | C side (eV) |         |         | N side (eV) |         |         |
|------------------------------------------|-------------|---------|---------|-------------|---------|---------|
|                                          | Titop       | FCC     | T-top   | Titop       | FCC     | T-top   |
| Li @ Ti <sub>3</sub> CNF <sub>2</sub>    | -244.90     | -245.08 | -244.07 | -244.74     | -244.94 | -243.98 |
| Li @ Ti <sub>3</sub> CNO <sub>2</sub>    | -268.88     | -269.28 | -268.22 | -268.57     | -268.92 | -267.88 |
| Li @ Ti <sub>3</sub> CN(OH) <sub>2</sub> | -291.73     | -292.02 | -291.05 | -291.71     | -291.92 | -291.13 |
| Li @ Ti <sub>3</sub> CN                  | -186.42     | -186.56 | -186.55 | -186.61     | -186.76 | -186.75 |

## 5. Bader charge population analysis

1) Bader charge of single Li on  $\text{Ti}_3\text{CN}$  and  $\text{Ti}_3\text{CNT}_2$   $4\times 4\times 1$  supercells

|                                          | C-side ( $ e $ ) | N-side ( $ e $ ) |
|------------------------------------------|------------------|------------------|
| Li @ $\text{Ti}_3\text{CN}$              | 0.157            | 0.151            |
| Li @ $\text{Ti}_3\text{CNF}_2$           | 0.104            | 0.103            |
| Li @ $\text{Ti}_3\text{CNO}_2$           | 0.112            | 0.112            |
| Li @ $\text{Ti}_3\text{CN}(\text{OH})_2$ | 0.282            | 0.282            |

2) Bader charge of T in  $\text{Ti}_3\text{CNT}_2$

|                                           | C-side ( $ e $ ) | N-side ( $ e $ ) |
|-------------------------------------------|------------------|------------------|
| F ( $\text{Ti}_3\text{CNF}_2$ )           | 7.766            | 7.776            |
| O ( $\text{Ti}_3\text{CNO}_2$ )           | 7.142            | 7.155            |
| O ( $\text{Ti}_3\text{CN}(\text{OH})_2$ ) | 7.321            | 7.327            |

**6. The Li diffusion barriers on  $\text{Ti}_3\text{CN}$  and  $\text{Ti}_3\text{CNT}_2$  (T= F, O, OH) calculation with GGA and GGA+ $U$  method**

|                                     | GGA (eV) |        | GGA + U (eV) |        |
|-------------------------------------|----------|--------|--------------|--------|
|                                     | C-side   | N-side | C-side       | N-side |
| $\text{Ti}_3\text{CN}$              | 0.016    | 0.030  | 0.024        | 0.026  |
| $\text{Ti}_3\text{CNF}_2$           | 0.254    | 0.248  | 0.256        | 0.243  |
| $\text{Ti}_3\text{CNO}_2$           | 0.317    | 0.262  | 0.301        | 0.263  |
| $\text{Ti}_3\text{CN}(\text{OH})_2$ | 0.343    | 0.297  | 0.256        | 0.219  |

## 7. The calculated DOS of $\text{Ti}_3\text{CN}$ ( $\text{Ti}_3\text{CN-Li}_{0.25}$ ) and $\text{Ti}_3\text{CNT}_2$ ( $\text{Ti}_3\text{CNT}_2\text{-Li}_{0.25}$ )

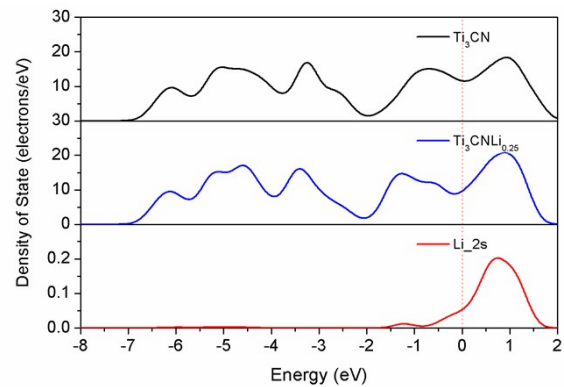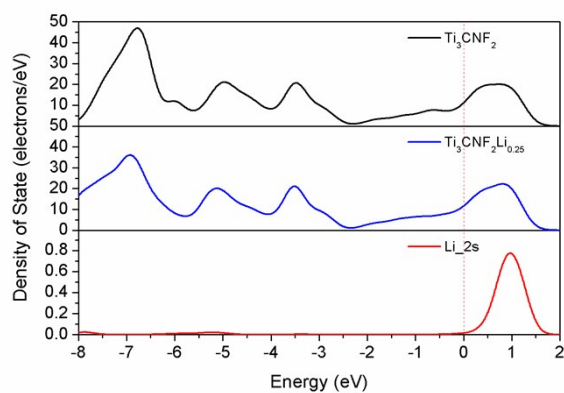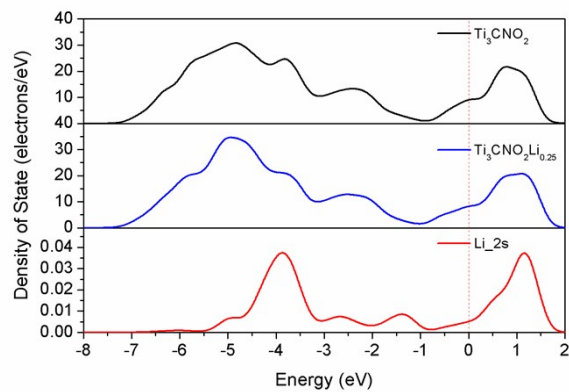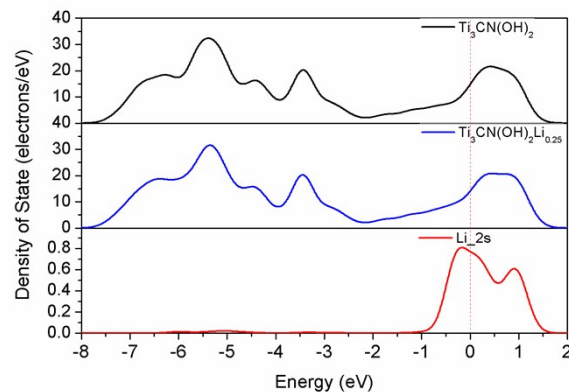

Supplement: c6cp06018h1.pdf [file c6cp06018h1.pdf]
